# Supplementary material for: Pseudomonas aeruginosa Biofilm Formation and Persistence, along with the Production of Quorum Sensing-Dependent Virulence Factors, Are Disrupted by a Triterpenoid Coumarate Ester Isolated from Dalbergia trichocarpa, a Tropical Legume
Source: PubMed Central journal article supplement (PMC4505864; doi:10.1371/journal.pone.0132791), 2015-07-17
Supplement: pone.0132791.s008.pdf [file pone.0132791.s008.pdf]

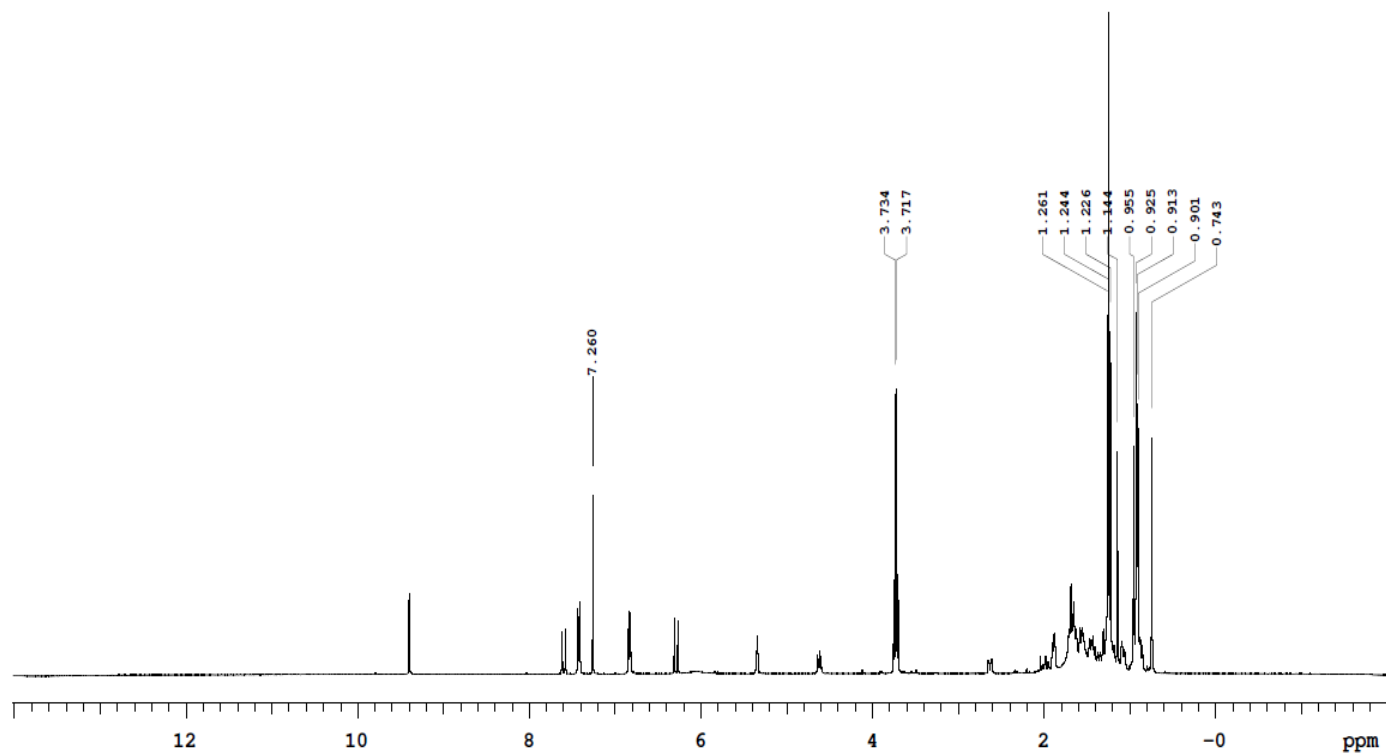

**Figure S3A.** <sup>1</sup>H NMR spectrum of oleanolic aldehyde coumarate in CDCl<sub>3</sub> (400 MHz)

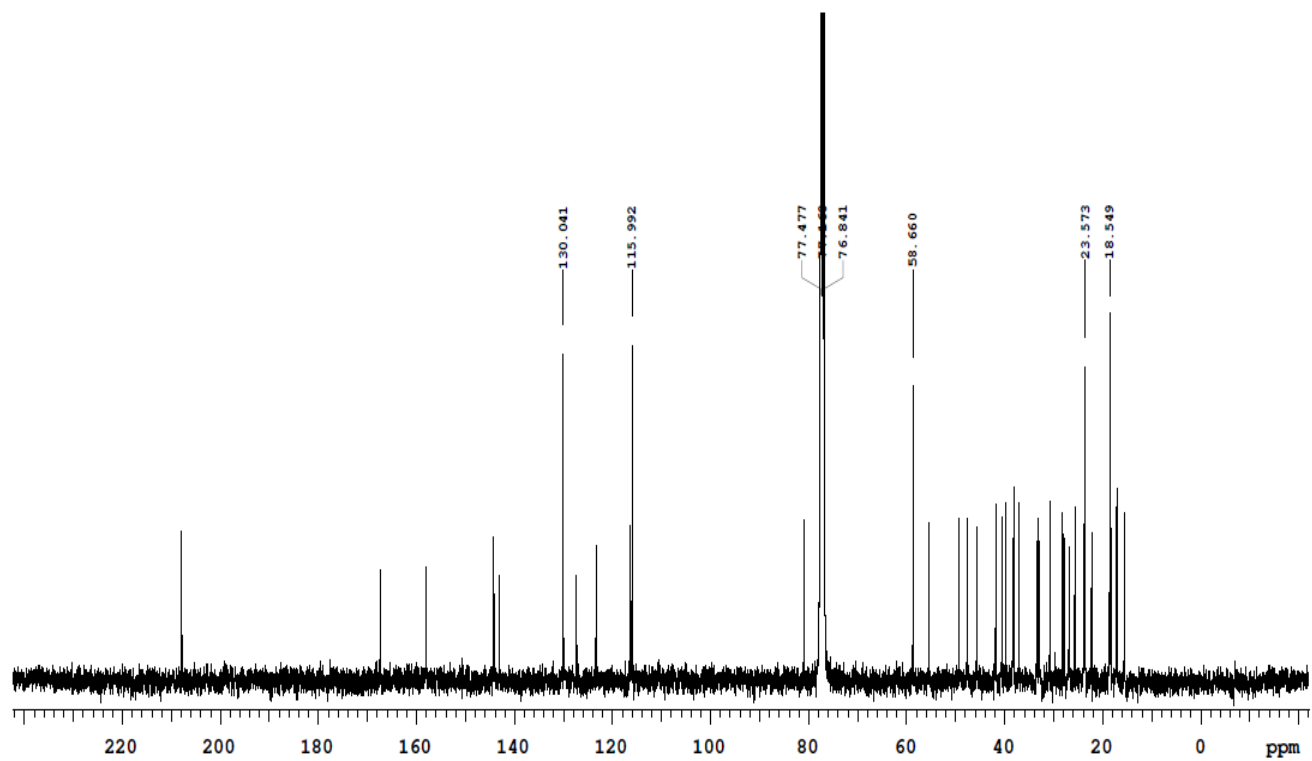

**Figure S3B.**  $^{13}\text{C}$  NMR spectrum of oleanolic aldehyde coumarate in  $\text{CDCl}_3$  (400 MHz)

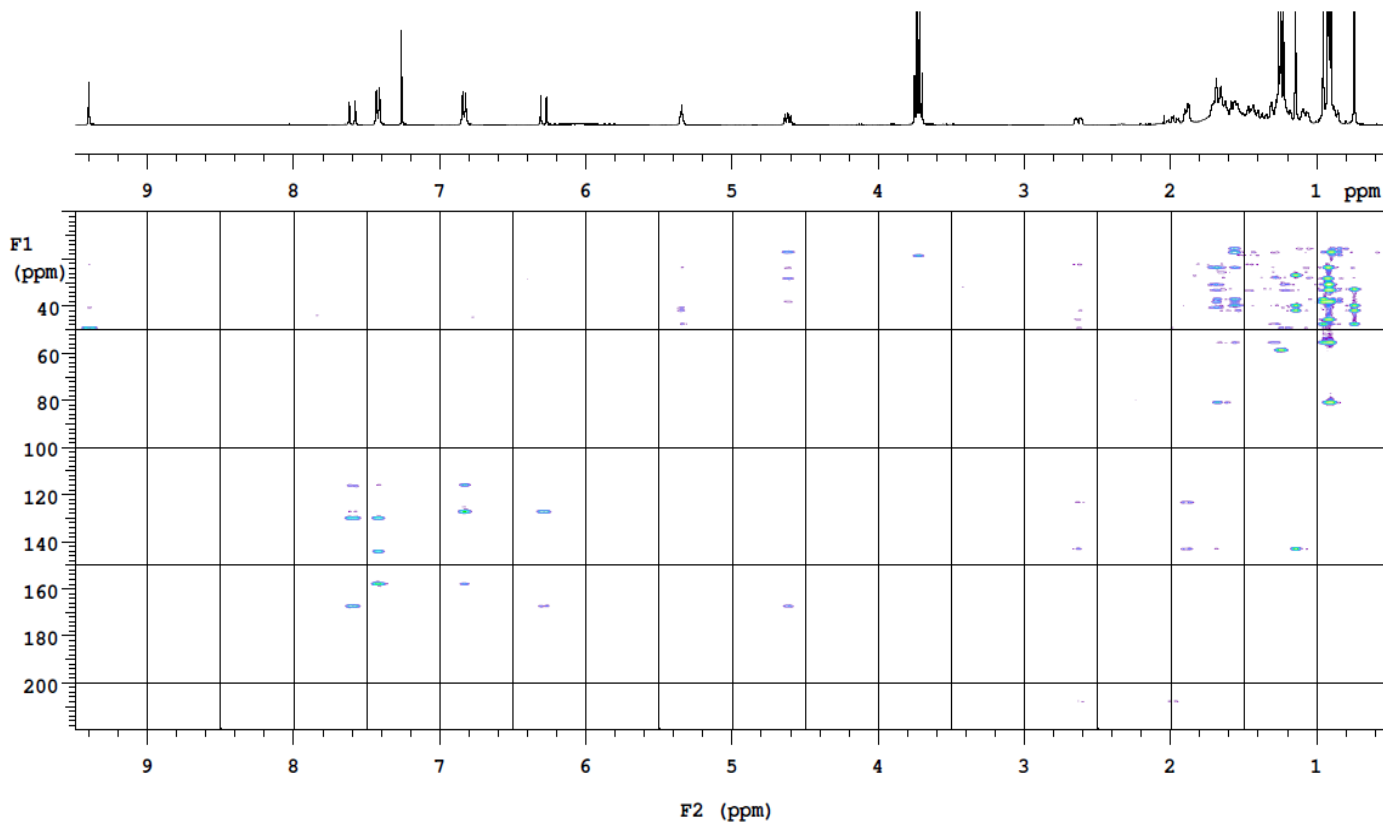

**Figure S3C.** HSQC NMR spectrum of oleanolic aldehyde coumarate in CDCl<sub>3</sub> (400 MHz)

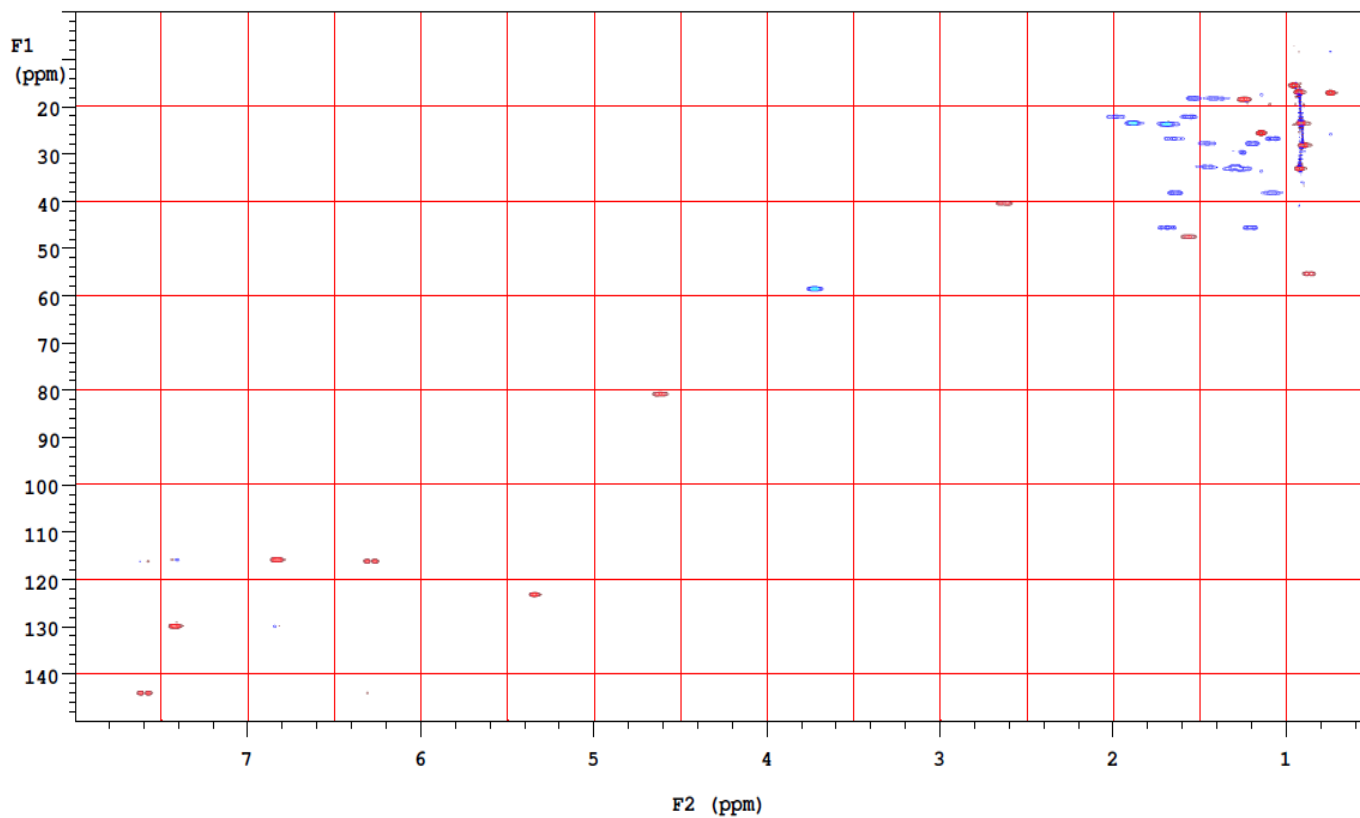

**Figure S3D.** HMBC NMR spectrum of oleanolic aldehyde coumarate in CDCl<sub>3</sub> (400 MHz)

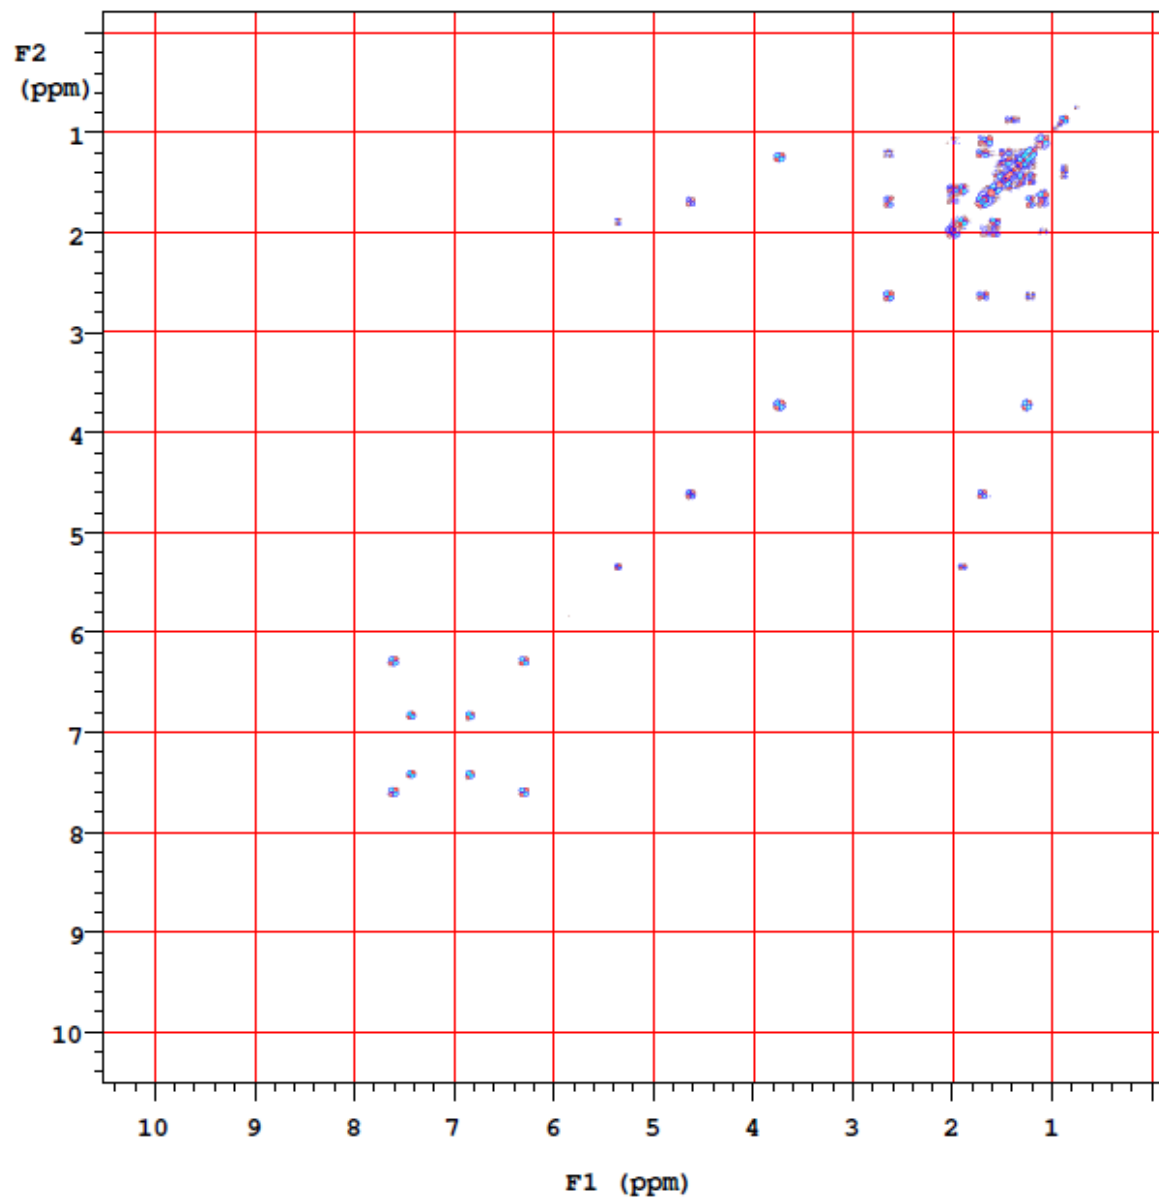

**Figure S3E.** COSY NMR spectrum of oleanolic aldehyde coumarate in CDCl<sub>3</sub> (400 MHz)

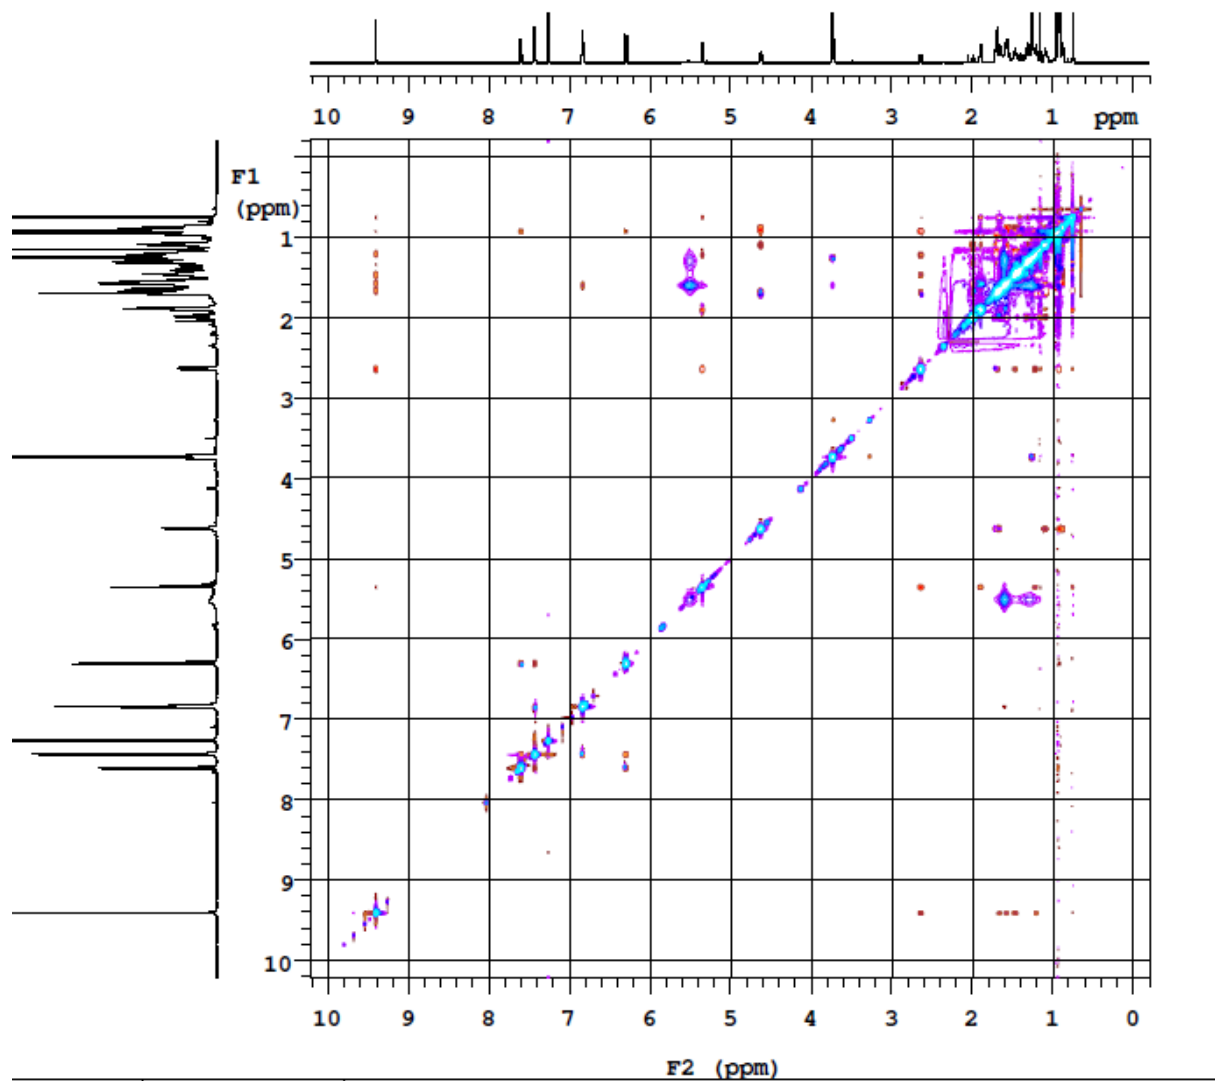

**Figure S3F.** NOESY NMR spectrum of oleanolic aldehyde coumarate in CDCl<sub>3</sub> (400 MHz)
